# Supplementary material for: Dark/Light Treatments Followed by γ-Irradiation Increase the Frequency of Leaf-Color Mutants in Cymbidium
Source: PubMed Central journal article supplement (PMC7238429; doi:10.3390/plants9040532), 2020-04-20
Supplement: plants-09-00532-s001.pdf [file plants-09-00532-s001.pdf]

## Supplementary Materials

**Table S1.** Primers for RT-qPCR analysis.

| ID             | Sequence (5' to 3')  |
|----------------|----------------------|
| <i>HEMD-F</i>  | CTTCGCCTCTGCTTCTCCT  |
| <i>HEMD-R</i>  | TGCCAGCACCAACA ACTCC |
| <i>HEME2-F</i> | TTATCGAGAACGCCCGTTT  |
| <i>HEME2-R</i> | TGTACCTCCCTGCTTGCCT  |
| <i>PORA-F</i>  | GCCTCCTCTTTCCTCGCAC  |
| <i>PORA-R</i>  | GGCTGTTGCTGTCGTCTGG  |
| <i>CHLG-F</i>  | GTCTCAGTCGCCGTCTCGA  |
| <i>CHLG-R</i>  | TCTTCCATTTGTCCGTGCC  |
| <i>CLH2-F</i>  | CATGGCTCCACCAGCAAAA  |
| <i>CLH2-R</i>  | CCTCCTTG TGCTCCCAAGG |
| <i>RCCR-F</i>  | TTCACACCGCCTCTCATCA  |
| <i>RCCR-R</i>  | AACCGAGGCGATCGTCAAC  |
| <i>Actin-F</i> | AATCCCAAGGCAAACAGA   |
| <i>Actin-R</i> | CCATACCAGAATCCAG     |
